# Supplementary material for: Characteristics of water jump for better performance in collegiate male 3000 m steeplechase
Source: PeerJ. 2023 Aug 24;11:e15918. doi: 10.7717/peerj.15918 (PMC10460561; doi:10.7717/peerj.15918)
Supplement: Supplemental Information 1 — Each data point indicates takeoff distance (m), landing distance (m) and clearance time (s) for both qualifiers (group 1) and non-qualifiers (group 2). [file peerj-11-15918-s001.xlsx]

## Sheet: rawdata
group	TF1	TF2	TF3	TF4	TF5	TF6	TF7	LD1	LD2	LD3	LD4	LD5	LD6	LD7	CT1	CT2	CT3	CT4	CT5	CT6	CT7
1	1.348	1.3178	1.2264	1.4163	1.2217	1.4821	1.3538	3.1832	3.1062	2.9067	3.1188	3.0303	3.3411	3.064	0.723333	0.773333	0.78	0.69	0.793333	0.783333	0.776667
1	1.5654	1.7254	1.4795	1.4657	1.4896	1.3619	1.497	2.864	2.923	3.0923	2.8812	2.8157	2.8508	2.7988	0.8	0.81	0.753333	0.846667	0.773333	0.79	0.79
1	1.4493	1.4384	1.4	1.1462	1.3797	1.3632	1.4581	3.2855	3.1361	3.1436	3.0612	2.9961	2.9612	3.064	0.75	0.763333	0.73	0.683333	0.74	0.72	0.706667
1	1.587	1.6887	1.433	1.6606	1.7763	1.3327	1.5931	3.1489	3.2122	3.4394	2.6774	3.1099	3.1224	3.1716	0.956667	0.94	0.92	0.846667	0.89	0.943333	0.793333
1	1.5824	1.4338	1.4468	1.1887	1.3203	1.3738	1.3851	3.1341	3.1633	2.8109	2.555	2.6018	2.9373	2.3976	0.82	0.873333	0.87	0.926667	0.866667	0.923333	0.856667
1	1.3494	1.4113	1.307	1.6075	1.4774	1.8075	1.4872	2.8066	2.8793	2.9138	3.0612	2.9513	3.1726	3.0713	0.86	0.7	0.696667	0.76	0.746667	0.736667	0.726667
1	1.2163	1.1783	1.4716	1.3738	1.4061	1.3408	1.3999	3.03	2.9113	3.2878	3.1944	2.8929	3.0904	3.211	0.763333	0.786667	0.796667	0.836667	0.83	0.806667	0.786667
1	1.4296	1.3309	1.6411	1.3889	1.4467	1.4678	1.5257	2.499	2.7609	2.972	3.0915	3.1651	3.0882	3.1582	0.86	0.843333	0.836667	0.836667	0.823333	0.883333	0.916667
1	1.5958	1.6653	1.588	1.3797	1.6647	1.5765	1.4871	2.9208	2.8709	2.4586	2.7326	2.7282	2.8756	2.5169	0.816667	0.806667	0.8	0.783333	0.783333	0.786667	0.83
1	1.3776	1.4188	1.4141	1.5181	1.4785	1.2552	1.4488	3.1742	2.7406	2.8597	2.6409	2.8333	2.3959	2.5557	0.83	0.773333	0.783333	0.76	0.776667	0.836667	0.783333
1	1.575	1.476	1.3952	1.3545	1.476	1.6188	1.5344	3.3739	3.2207	3.3234	3.1029	3.2347	3.3553	2.7136	0.73	0.81	0.673333	0.71	0.796667	0.773333	0.72
1	1.5885	1.3954	1.3399	1.3973	1.3294	1.4581	1.5418	2.9228	2.7871	2.814	2.7588	2.522	2.8003	2.8911	0.796667	0.826667	0.833333	0.786667	0.8	0.703333	0.766667
1	1.3705	1.4405	1.3619	1.5008	1.5008	1.6121	1.5397	2.8719	3.057	2.9189	2.8266	2.8861	2.5591	2.8646	0.803333	0.783333	0.776667	0.723333	0.83	0.85	0.85
1	1.3026	1.4805	1.412	1.4027	1.4392	1.2345	1.2601	2.7858	2.6903	3.0812	2.9648	3.111	2.8643	2.6018	0.746667	0.696667	0.736667	0.656667	0.676667	0.67	0.686667
1	1.378	1.7034	1.3549	1.4077	1.6381	1.6172	1.4757	3.1942	3.1192	3.2315	3.0208	2.8374	2.5821	2.9437	0.896667	0.906667	0.863333	0.836667	0.903333	0.93	0.82
1	1.4812	1.3829	1.4969	1.3274	1.4752	1.4585	1.3889	3.2878	3.0032	3.0229	2.9848	3.1399	3.1479	2.8923	0.706667	0.663333	0.66	0.663333	0.72	0.74	0.71
1	1.31	1.3269	1.256	1.2635	1.3138	1.3623	1.3026	3.1064	3.3532	3.061	3.2065	3.1662	3.0098	3.1789	0.89	0.796667	0.856667	0.873333	0.726667	0.866667	0.87
1	1.2255	1.3674	1.4079	1.3115	1.384	1.4283	1.4314	2.5742	2.641	2.6938	2.3696	2.7299	2.5074	2.482	0.81	0.743333	0.863333	0.793333	0.813333	0.786667	0.816667
1	1.4658	1.5003	1.4214	1.4851	1.5997	1.5914	1.6382	2.6677	2.987	3.0004	2.7297	3.0161	3.0157	3.1225	0.873333	0.85	0.816667	0.813333	0.77	0.83	0.84
1	1.6251	1.4833	1.5124	1.3534	1.4141	1.2766	1.423	2.6716	2.7472	2.691	2.4193	2.478	2.3454	2.4193	0.76	0.78	0.826667	0.846667	0.853333	0.786667	0.833333
1	1.3044	1.1698	1.1174	1.1725	1.1067	1.4024	1.275	3.0457	2.9347	2.8972	2.9741	2.9231	2.9538	2.7614	0.75	0.69	0.716667	0.69	0.723333	0.703333	0.716667
1	1.4126	1.3834	1.4168	1.3704	1.4152	1.3749	1.543	2.8724	2.7924	2.9473	2.9415	3.105	3.107	3.0052	0.896667	0.843333	0.803333	0.78	0.876667	0.89	0.766667
1	1.5895	1.536	1.586	1.6619	1.4024	1.5208	1.6061	3.7786	3.2184	3.1915	3.5143	3.4585	3.4349	3.2237	0.823333	0.786667	0.776667	0.723333	0.823333	0.77	0.806667
1	1.2297	1.1487	1.1991	1.3269	1.1803	1.1894	1.3704	3.3541	2.9204	3.1745	3.0904	3.0457	3.0083	3.2804	0.913333	0.833333	0.826667	0.78	0.9	0.88	0.87
2	1.2423	1.2712	1.327	1.387	1.2202	1.4774	1.3291	2.7158	2.7575	2.213	2.6782	2.6977	2.6618	2.6616	0.746667	0.683333	0.62	0.673333	0.663333	0.706667	0.77
2	1.2817	1.0613	1.2223	1.0863	1.3969	1.0768	1.248	3.0702	2.6984	3.008	2.7965	2.8712	2.5364	2.7563	0.816667	0.743333	0.85	0.84	0.783333	0.82	0.813333
2	1.5185	1.1982	1.5765	1.6294	1.1863	1.5413	1.2768	2.523	2.7276	2.6874	2.7698	2.8988	2.4999	2.6817	0.876667	0.89	0.89	0.94	0.863333	0.84	0.77
2	1.2176	1.2275	1.2693	1.0246	1.2671	1.3269	1.3026	2.4332	2.6298	2.6071	2.4678	2.6458	2.5285	2.6834	0.733333	0.753333	0.693333	0.703333	0.723333	0.793333	0.76
2	1.5849	1.6507	1.553	1.4685	1.5643	1.3558	1.256	3.197	3.1242	2.9918	2.9138	2.7209	2.7585	2.784	0.756667	0.76	0.713333	0.78	0.766667	0.76	0.746667
2	1.2258	0.9879	0.9181	1.3136	1.4372	1.3403	1.2127	2.4965	2.5014	2.2827	2.7773	2.8718	2.8425	2.7099	0.713333	0.72	0.713333	0.736667	0.723333	0.74	0.696667
2	1.2578	1.5286	1.3349	1.0355	1.3423	1.278	1.2582	2.9962	3.0055	3.084	2.6656	3.1655	2.776	2.6378	0.786667	0.793333	0.83	0.766667	0.733333	0.756667	0.763333
2	1.4724	1.2847	1.3315	1.3382	1.3403	1.1599	1.1804	2.9841	2.5758	2.5984	2.6599	2.7577	3.0294	2.8479	0.593333	0.726667	0.743333	0.726667	0.743333	0.746667	0.74
2	1.3747	1.5514	1.5247	1.4257	1.2262	1.2919	1.209	2.9437	2.4963	2.8355	3.0311	2.7766	2.7746	2.5712	0.74	0.67	0.7	0.7	0.686667	0.706667	0.713333
2	1.4155	1.4203	1.3677	1.1798	1.5366	1.3548	1.1222	2.9806	2.8205	2.8372	2.6865	2.4215	2.5906	2.1767	0.773333	0.68	0.77	0.723333	0.783333	0.763333	0.73
2	1.3005	1.489	1.533	1.2009	1.3865	1.3046	1.3419	2.9205	2.9365	2.7868	2.8238	2.7732	2.6612	2.7732	0.863333	0.81	0.713333	0.83	0.85	0.84	0.846667
2	1.3213	1.3407	1.2621	1.196	1.2665	1.217	1.1776	2.7472	2.4193	2.7128	2.3031	1.9643	2.1978	2.4663	0.813333	0.72	0.793333	0.82	0.806667	0.876667	0.873333
2	1.3521	1.5639	1.4	1.4483	1.4749	1.4894	1.4645	3.0067	2.8199	2.5605	2.7226	2.6632	3.0062	2.8272	0.736667	0.75	0.726667	0.716667	0.806667	0.803333	0.773333
2	1.2244	1.164	1.3626	1.2803	1.3136	1.2269	1.3916	3.017	2.7635	2.395	2.7092	2.925	2.7338	2.7578	0.773333	0.85	0.996667	0.793333	0.856667	0.79	0.846667
2	1.4973	1.4869	1.4126	1.317	1.2687	1.3854	1.5564	2.977	2.9948	3.0001	3.0323	2.8703	2.8359	2.9057	0.766667	0.733333	0.666667	0.803333	0.813333	0.88	0.796667
2	1.0067	1.2327	1.2092	1.179	1.2634	1.307	1.4359	2.4014	2.3577	2.3211	2.2375	2.4402	2.3544	2.3381	0.813333	0.766667	0.75	0.743333	0.84	0.813333	0.813333
2	1.1512	1.2159	1.077	1.3882	1.1716	1.3072	1.1961	3.3981	3.5268	3.4237	3.4038	3.2107	2.9146	2.6834	0.806667	0.75	0.75	0.84	0.79	0.79	0.81
2	1.3857	1.2968	1.2531	1.3967	1.5081	1.4577	1.3527	2.4851	2.6272	2.6491	2.609	2.4585	2.5047	2.504	0.723333	0.793333	0.806667	0.823333	0.846667	0.81	0.856667
2	1.2851	1.3026	1.4423	1.252	1.164	1.2939	1.2327	2.8987	2.4871	2.7157	2.5931	2.329	2.6692	2.4744	0.846667	0.816667	0.816667	0.796667	0.83	0.84	0.873333
2	1.4848	1.4381	1.4182	1.3285	1.2637	1.3671	1.3905	3.1408	3.1809	3.0839	2.9609	2.6833	2.8199	2.8331	0.8	0.806667	0.76	0.886667	0.856667	0.87	0.856667
2	1.4558	1.2547	1.4653	1.6728	1.4958	1.3987	1.2114	2.9335	2.9208	2.9164	3.1915	3.1765	2.9294	2.7703	0.83	0.786667	0.79	0.79	0.833333	0.853333	0.836667
2	1.3402	1.2964	1.4631	1.5018	1.5252	1.4714	1.5467	3.0518	2.9666	3.1807	3.1102	3.0367	3.279	2.9906	0.736667	0.653333	0.703333	0.643333	0.65	0.73	0.76
2	1.2127	1.4019	1.2147	1.4958	1.2904	1.3938	1.1796	2.7584	2.6464	2.6939	2.6581	2.3454	2.6347	1.8935	0.746667	0.793333	0.73	0.753333	0.76	0.856667	0.81
2	1.407	1.8748	1.8575	1.3177	1.6198	1.7641	1.3853	2.9466	2.0597	1.7167	2.2845	2.261	2.3861	2.7799	0.76	0.763333	0.776667	0.753333	0.78	0.78	0.783333
